# Supplementary material for: In situ LA-ICPMS U–Pb dating of sulfates: applicability of carbonate reference materials as matrix-matched standards
Source: Copernicus journal article supplement (doi:10.5194/gchron-4-601-2022), 2022-09-06
Supplement: Supplementary file 1 [file Table S1. Element data.xlsx]

## Sheet: Sheet1
Analysis number	name /	207Pba	Ub	Pbb	Thb	238Uc	±2s	207Pbc	±2s
	sample	(cps)	(ppm)	(ppm)	U	206Pb	(%)	206Pb	(%)
U436	MTO 4-4	11732.1	0.0754985	0.02652	0.167	11.6569	12.0733	0.820777	3.20904
U438		197284	0.257826	0.459128	0.323884	2.04322	15.4849	0.826926	0.795769
U447		1.52693e+06	0.963247	3.85624	0.181545	0.851007	11.1313	0.830668	0.411227
U448		28825	0.0336195	0.0660301	0.334609	1.94173	21.924	0.835004	1.5593
U449		25728.9	0.520817	0.0580208	0.140149	34.3858	8.36054	0.802436	1.61501
U450		10535.5	0.337662	0.0242087	0.105336	51.353	7.15106	0.801927	1.79392
U451		103061	0.965391	0.23322	0.374114	15.8692	11.1154	0.816981	0.807945
U453		84861.9	0.666678	0.188298	0.107554	13.9136	15.4744	0.818224	0.712667
U455		813450	1.13906	1.87667	0.132996	2.2762	11.5978	0.826592	0.497927
U456		434819	0.819022	0.946847	0.155521	3.52869	6.143	0.833259	0.510236
U457		334973	0.161826	0.8159	0.162344	0.703365	21.4785	0.837316	0.804157
U458		137635	0.918851	0.348541	0.127124	8.8701	14.5684	0.822992	0.77393
U459		122106	0.413243	0.252509	0.138004	7.28418	9.79779	0.824803	0.846602
U460		66244.9	1.06072	0.157845	0.137216	24.3646	7.15256	0.809629	1.19274
U461		96692.5	1.66131	0.243411	0.129437	23.0036	7.82841	0.819507	0.870737
U463		153816	1.34677	0.385012	0.16592	11.8703	6.6042	0.822423	0.844528
U464		533967	1.51906	0.957571	0.148174	9.98403	12.7302	0.829176	0.695195
U465		198998	1.84868	0.454604	0.125008	15.4815	7.38841	0.81954	0.700038
U466		230504	0.818166	0.577215	0.224654	5.05045	7.33107	0.824065	0.664235
U467		16206.3	0.00587266	0.0489011	1.0807	0.401317	25.3041	0.829452	2.08666
U468		392950	1.61154	0.869098	0.102104	7.46624	9.54388	0.823034	0.567815
U469		142184	0.564054	0.341709	0.182589	5.89531	6.30426	0.828517	0.752184
U470		105200	1.18463	0.246329	0.107487	17.7303	6.18977	0.823091	0.760624
U471		165896	1.22891	0.406681	0.136694	10.5311	12.866	0.82353	0.819628
U472		101404	0.730962	0.264634	0.361261	9.15961	11.9139	0.824571	1.15377
U473		139917	1.97884	0.352344	0.112577	18.9747	6.17528	0.817254	0.662335
U474		309796	1.74108	0.744876	0.116863	8.42225	9.38936	0.819307	0.763497
U475		190576	1.96023	0.478283	0.105939	14.0024	15.1341	0.817196	0.755147
U476		489694	1.75857	1.21227	0.118133	5.06524	8.25944	0.828778	0.513744
U477		627160	1.50529	1.57288	0.164323	3.30265	18.7199	0.828982	0.526989
U479		62648.3	0.553909	0.150959	0.221291	13.1864	6.97215	0.818574	0.913136
U480		186988	0.587957	0.400062	0.27654	6.26569	11.264	0.827226	0.571857
U481		65835.9	0.252479	0.171223	0.382646	4.83437	9.8804	0.82658	0.820799
U482		211822	1.93903	0.533141	0.213911	12.5109	5.9603	0.81866	0.695004
U576	MTO 11-3	62811.7	1.17352	0.1573	0.311541	26.792	7.18418	0.813839	0.93062
U577		71209.5	1.55262	0.182583	0.208009	29.9051	11.0016	0.805064	1.06861
U578		27052.8	1.34091	0.062708	0.146676	82.259	5.54091	0.777537	1.16812
U579		66174.7	1.0888	0.161373	0.325448	25.2509	5.21576	0.812253	0.916559
U580		73038.3	1.27004	0.184509	0.329436	24.3544	4.88765	0.809153	1.02305
U581		116332	0.918482	0.309283	0.613304	9.98065	5.56002	0.820947	0.708327
U582		183789	1.51309	0.483898	0.221813	10.5545	7.83692	0.815167	0.683162
U583		282627	2.02864	0.731421	0.304118	9.60105	6.31909	0.82173	0.526772
U584		216408	3.02041	0.510278	0.146885	23.044	10.2532	0.818115	0.611395
U585		53626.8	0.563308	0.122347	0.336431	20.1501	15.2052	0.814351	1.29108
U586		93651.8	0.348689	0.2515	1.56524	4.61437	7.79686	0.825147	0.709421
U587		192319	1.47475	0.46558	0.235084	11.9039	14.309	0.821536	0.735835
U588		350075	2.71053	0.693796	0.225134	21.1716	16.003	0.815353	0.697334
U589		87554.5	0.2701	0.234245	2.50736	3.8771	6.33162	0.831278	0.84641
U590		298582	1.71293	0.66635	0.204791	11.2007	18.1248	0.821643	0.679521
U591		263989	3.48618	0.496291	0.132925	42.546	13.1651	0.796002	0.587245
U592		137796	1.15683	0.360794	0.52895	11.0129	6.52156	0.818206	0.63299
RM0
A001	NIST	452362	0.827744	2.2581	0.913398	1.257	0.750392	0.871	0.399388
A002	NIST	452076	0.827826	2.269	0.893165	1.242	0.480434	0.8711	0.303159
A033	NIST	473008	0.8314	2.3142	0.870996	1.231	0.520441	0.871	0.289026
A034	NIST	461381	0.812936	2.26084	0.935129	1.23	0.448032	0.8702	0.318789
A067	NIST	464141	0.810902	2.24819	0.873496	1.232	0.678436	0.8705	0.250987
A068	NIST	473188	0.814582	2.29287	0.950467	1.215	0.500619	0.8709	0.240459
A102	NIST	467996	0.826744	2.26403	0.899087	1.251	0.536238	0.871	0.303855
A103	NIST	478388	0.820897	2.31123	0.929852	1.214	0.40451	0.8719	0.256266
A146	NIST	461249	0.82084	2.24425	0.909858	1.253	0.643504	0.8714	0.262654
A147	NIST	465546	0.822609	2.2629	0.952477	1.246	0.567454	0.8719	0.281316
A194	NIST	459195	0.830718	2.2657	0.894189	1.257	0.489443	0.8705	0.285718
A195	NIST	463673	0.831802	2.28785	0.942658	1.245	0.501954	0.8728	0.24873
A238	NIST	455750	0.839552	2.30306	0.886165	1.248	0.566548	0.8691	0.213622
A239	NIST	454132	0.828589	2.29622	0.912471	1.235	0.605589	0.8718	0.282776
A283	NIST	435250	0.818801	2.26379	0.856706	1.235	0.622257	0.8681	0.280624
A284	NIST	437868	0.820933	2.27918	0.944302	1.234	0.388135	0.8709	0.209519
A328	NIST	418131	0.807338	2.2381	0.839469	1.238	0.688398	0.872	0.272081
A329	NIST	419657	0.812682	2.24878	0.937506	1.239	0.525704	0.8728	0.296817
A383	NIST	407260	0.817498	2.27236	0.856431	1.232	0.476626	0.8698	0.306025
A384	NIST	422041	0.828735	2.35534	0.920884	1.206	0.432721	0.8702	0.280488
A439	NIST	389256	0.825063	2.26673	0.928932	1.246	0.406703	0.8699	0.192383
A440	NIST	391763	0.816053	2.27593	0.898861	1.23	0.417439	0.8719	0.229975
A494	NIST	374637	0.826942	2.2488	0.955972	1.264	0.346978	0.8732	0.27438
A495	NIST	378311	0.821383	2.28314	0.929522	1.232	0.406399	0.8698	0.200138
A549	NIST	374808	0.846758	2.30445	0.977019	1.261	0.355874	0.8738	0.292872
A550	NIST	371383	0.826963	2.29203	0.877836	1.233	0.615776	0.8702	0.34136
A593	NIST	360605	0.816131	2.24124	0.878429	1.247	0.521811	0.8714	0.241236
A594	NIST	369215	0.811685	2.29031	0.883083	1.214	0.578816	0.8689	0.245454
RM1
B003	WC	29315.8	2.99891	0.191459	<0.001	20.41	5.18706	0.1759	15.6547
B004	WC	19020.5	2.98614	0.241024	0.00134855	21.38	4.73052	0.1352	5.45729
B035	WC	17011.4	4.27935	0.191823	<0.001	22.97	4.66165	0.09148	5.56733
B036	WC	10977.9	2.33528	0.113694	<0.001	22.23	4.64246	0.104	2.45533
B069	WC	13035	2.9307	0.137861	<0.001	22.73	4.64796	0.1008	2.27043
B070	WC	20185.1	2.46939	0.14266	<0.001	21	4.73845	0.1548	10.1632
B104	WC	14949.5	3.3188	0.156165	<0.001	22.92	4.64968	0.1034	2.50898
B105	WC	17818.5	3.09212	0.16137	<0.001	22.06	4.66211	0.1253	3.33295
B148	WC	14539.8	3.72806	0.163447	<0.001	23.89	4.63699	0.09201	3.29611
B149	WC	16094.1	2.7159	0.145136	<0.001	21.7	4.67383	0.1294	2.32585
B196	WC	16778	4.42947	0.194081	<0.001	23.69	4.63532	0.09084	3.76081
B197	WC	16383.9	3.31973	0.158927	<0.001	23.35	4.66917	0.1174	2.3193
B240	WC	11619.1	2.16562	0.109699	<0.001	22.63	4.67646	0.1259	3.1202
B241	WC	15207.8	3.04598	0.149901	<0.001	22.82	4.65162	0.1183	2.29586
B285	WC	9830.26	1.98772	0.097916	<0.001	23.32	4.64924	0.1217	3.76536
B286	WC	16607.2	3.52205	0.166985	<0.001	23.65	4.63656	0.1182	3.25321
B330	WC	10780.3	2.01716	0.106171	<0.001	22.19	4.73401	0.1301	3.00242
B331	WC	12440.4	2.40477	0.123948	<0.001	22.7	4.66551	0.1279	2.88651
B385	WC	12487.2	3.40365	0.155019	0.00133153	23.28	4.64616	0.0986	2.76236
B386	WC	11064.8	2.30619	0.117761	<0.001	22.72	4.65839	0.1242	3.19827
B441	WC	9458.98	2.93823	0.127304	<0.001	24.08	4.62835	0.09136	2.9856
B442	WC	15957.9	2.54884	0.151497	<0.001	21.04	4.81405	0.1583	4.17745
B496	WC	11208.3	3.47233	0.15606	<0.001	23.71	4.63221	0.09387	2.78314
B497	WC	12671	3.15146	0.153055	<0.001	22.81	4.65392	0.1126	3.99178
B551	WC	10409.3	3.00616	0.138049	<0.001	23.39	4.6514	0.1023	2.70889
B552	WC	12348.8	2.88101	0.146066	<0.001	22.73	4.66582	0.1235	3.54305
B595	WC	11061.3	3.54163	0.156123	<0.001	24.24	4.63087	0.09561	1.66048
B596	WC	11751.8	3.13483	0.145974	<0.001	23.93	4.65346	0.1147	2.37476
RM2
C005	ASH	1489.4	0.78307	0.00407861	<0.001	707.2	9.33467	0.6715	30.4517
C006	ASH	1982.97	0.837595	0.835199	<0.001	312.9	9.6469	0.7082	17.1882
C037	ASH	2190.27	3.14546	0.010405	<0.001	767.7	6.64758	0.5316	5.71069
C038	ASH	2546.44	0.995717	0.010603	<0.001	296.4	7.32792	0.7365	5.88091
C071	ASH	1485.49	1.22156	0.0064562	<0.001	552.4	7.54006	0.6386	7.97049
C072	ASH	1569.94	1.31846	0.00691827	<0.001	611.1	7.32614	0.6018	19.927
C106	ASH	1862.03	2.46032	0.00824416	<0.001	797.5	6.93655	0.5758	5.37837
C107	ASH	1230.09	0.842191	0.00557687	<0.001	501.6	9.85657	0.6853	9.36372
C150	ASH	1047.35	2.02677	0.00500725	<0.001	960.1	7.29609	0.4786	8.51473
C151	ASH	10969.5	0.753871	0.0433042	<0.001	61.02	7.1936	0.8243	2.2051
C198	ASH	3579.17	1.36561	0.0152536	<0.001	308.8	10.1427	0.7552	3.55492
C199	ASH	1429.48	2.30941	0.00669672	<0.001	918.8	6.5696	0.5403	7.66739
C242	ASH	1072.39	0.653143	0.00524271	<0.001	401.7	8.48728	0.6704	8.19819
C243	ASH	4578.77	1.16096	0.020268	<0.001	191.6	5.69938	0.8114	3.21596
C287	ASH	1322.74	1.14653	0.00590117	<0.001	579.2	8.28982	0.6579	12.6237
C288	ASH	2497.73	0.948505	0.0113911	<0.001	283.5	6.99289	0.7498	4.28649
C332	ASH	2823.45	0.770642	0.0117441	<0.001	257.8	13.0719	0.7902	6.93495
C333	ASH	1621.69	2.65614	0.00814389	<0.001	877.6	6.31748	0.539	7.16301
C387	ASH	867.435	0.71943	0.00251195	<0.001	884.6	7.65897	0.5198	10.8043
C388	ASH	770.105	2.53081	0.00445109	<0.001	1196	6.966	0.4028	9.41184
C443	ASH	1122.63	0.86639	0.00553293	<0.001	475.5	8.04102	0.6598	7.95897
C444	ASH	902.506	1.63031	0.00471181	<0.001	974.9	6.91908	0.5197	12.5685
C498	ASH	2380.62	1.08364	0.00432275	<0.001	783	9.10433	0.5473	12.9211
C499	ASH	1181.24	2.34201	0.00744022	<0.001	878.6	7.0417	0.521	7.56889
C553	ASH	932.402	1.02011	0.00501788	<0.001	589.2	7.5113	0.6179	10.9075
C554	ASH	1423.56	1.56003	0.00819511	<0.001	549.3	7.40575	0.6238	5.43603
C597	ASH	797.317	1.50948	0.00497453	<0.001	970.2	10.0671	0.5004	13.461
C598	ASH	678.862	1.78022	0.00425385	<0.001	1010	8.03417	0.4915	14.6174
