# Supplementary material for: In situ LA-ICPMS U–Pb dating of sulfates: applicability of carbonate reference materials as matrix-matched standards
Source: Copernicus journal article supplement (doi:10.5194/gchron-4-601-2022), 2022-09-06
Supplement: Supplementary file 2 [file Table S2. Neptune data.xlsx]

## Sheet: Sheet1
Analysis number	name /	207Pba	Ub	Pbb	Thb	238Uc	±2s	207Pbc	±2s	sequence
	sample	(cps)	(ppm)	(ppm)	U	206Pb	(%)	206Pb	(%)
009_U	BOX 108	47348.2	1.48424	0.115972	0.0721479	20.1703	5.29721	0.816558	0.710721	1
010_U		44263	1.05478	0.0557404	0.226607	29.8286	6.59921	0.816013	0.885317	1
011_U		8119.85	0.300885	0.0193845	0.131569	24.4924	6.68819	0.818722	1.42452	1
012_U		159615	0.702654	0.389928	0.221082	2.86442	15.1201	0.832114	0.560647	1
013_U		52758.4	1.66028	0.106732	0.150946	24.4425	7.12259	0.810886	0.676635	1
015_U		45814.9	1.21148	0.102576	0.1407	18.6564	5.77651	0.820513	0.68608	1
016_U		210465	0.667457	0.503548	0.143542	2.10678	5.78334	0.831896	0.501411	1
017_U		153200	1.11687	0.195161	0.16839	9.09435	11.0988	0.830697	0.556154	1
020_U		8659.51	1.26723	0.021083	0.0878327	91.8521	5.57079	0.761561	1.63727	1
020_Ui		54426.4	1.0505	0.110291	0.0992712	15.0482	5.708	0.820741	0.678309	1
021_U		40138.1	1.33352	0.0808183	0.114691	26.0619	13.4151	0.82021	0.750287	1
022_U		13275.8	2.00954	0.0341588	0.0564114	90.5064	4.31216	0.773288	1.18349	1
024_U		15688.5	0.49907	0.0364121	0.0662418	21.6662	4.82779	0.821892	1.39352	1
025_U		24934.3	0.773299	0.0605743	0.175495	20.2165	8.64701	0.825327	0.89802	1
026_U		217333	1.35296	0.493785	0.144084	4.3483	7.37407	0.829021	0.467987	1
027_U		45280.2	4.26738	0.121703	0.357537	54.7974	3.97975	0.801371	0.752809	1
028_U		106376	4.1945	0.256348	0.357403	25.8486	6.82327	0.820761	0.630708	1
029_U		46138	1.08638	0.111663	0.518321	15.4038	9.02906	0.824739	0.853461	1
030_U		143271	1.29	0.314186	0.0984191	6.51463	12.28	0.828608	0.497944	1
031_U		104559	1.02819	0.257391	0.135633	6.33598	3.4992	0.828052	0.561187	1
032_U		66441	0.93677	0.154406	0.329553	9.63694	5.22421	0.830708	0.781009	1
033_U		40960.7	1.75979	0.0991364	0.123106	28.05	4.80122	0.821271	0.760399	1
034_U		14701.9	1.05367	0.0348813	0.115495	47.1506	5.12178	0.799244	1.60104	1
035_U		28122.3	1.05826	0.067205	0.0655157	24.7795	10.324	0.813646	0.873128	1
036_U		42203	0.59204	0.101701	0.0807813	9.23188	9.17012	0.827725	0.714665	1
037_U		164255	1.12502	0.374621	0.141024	4.7661	15.16	0.829149	0.528416	1
038_U		260017	1.77962	0.48875	0.0984696	5.78305	10.6334	0.830193	0.46986	1
039_U		27954.1	1.05412	0.0540071	0.241148	30.8105	5.53628	0.819107	0.830886	1
040_U		59628.8	0.957152	0.127633	0.690023	11.8956	3.55029	0.828045	0.647295	1
041_U		20142.3	1.17718	0.0469418	0.064199	39.2314	10.9411	0.802975	1.08001	1
042_U		172098	0.867404	0.461953	0.328527	2.98372	11.6925	0.831497	0.507358	1
043_U		26952.7	0.611808	0.0399753	0.0403966	24.1267	8.58312	0.81636	0.982604	1
044_U		25995.2	1.0879	0.0625556	0.145052	27.3607	5.87255	0.813291	1.07422	1
045_U		30037.8	0.940778	0.0714401	0.148601	20.8067	11.8154	0.82097	1.02879	1
046_U		416821	0.975634	0.725087	0.0708964	2.13804	27.0716	0.830932	0.458198	1
047_U		27537.4	1.58793	0.0499392	0.339472	49.5457	9.31057	0.795624	1.09454	1
048_U		34115.8	1.53212	0.0834794	0.232882	28.8916	3.27136	0.814364	0.759554	1
049_U		9837.11	1.21328	0.0234274	0.102169	80.0806	3.24861	0.782535	1.24796	1
050_U		17639.2	5.69545	0.0537405	0.0306759	158.006	6.94554	0.718823	1.33573	1
059_U		60318.3	1.93791	0.150231	0.204082	20.2919	5.90646	0.813118	0.815292	1
060_U		14510.2	1.12296	0.030318	0.100788	57.7936	5.65423	0.797922	1.07431	1
061_U		99693	0.90136	0.231549	0.0983024	6.17472	11.4336	0.828014	0.638419	1
062_U		106403	1.36427	0.231047	0.0776754	9.36357	6.55626	0.827473	0.541694	1
063_U		33943.5	1.35735	0.0491403	0.191822	43.084	8.41893	0.797044	1.14719	1
067_U		9178.28	0.251959	0.0193812	0.191898	20.5348	4.56792	0.820223	1.3639	1
068_U		60040.2	3.425	0.14243	0.0633321	37.7705	7.06325	0.81035	0.70537	1
069_U		42919.6	3.33093	0.108586	0.0598152	47.9904	6.51979	0.803131	0.777176	1
070_U		71311.9	2.09966	0.176537	0.0685822	18.7747	8.02158	0.819376	0.730095	1
071_U		16426.9	1.55253	0.0398193	0.0363584	60.5596	6.47522	0.790046	1.37641	1
009_U	BCR 9644	1030.68	0.0605687	0.00129307	0.0115033	74.4934	7.0452	0.832363	3.86555	2
010_U		87.162	0.00570673	0.000131178	0.0055792	68.3392	11.2031	0.810485	13.0852	2
011_U		87.1408	0.0137814	0.000135872	<0.001	156.199	10.4359	0.773644	13.5862	2
014_U		109.536	0.0200291	0.000127241	0.00829437	243.463	9.5212	0.778326	12.6892	2
015_U		343.445	0.0157639	0.000230142	0.00295709	108.736	9.34579	0.826287	8.39556	2
017_U		336.829	0.0358666	0.0004368	<0.001	130.137	9.70153	0.825926	7.13496	2
018_U		124.663	0.0248385	0.000174298	<0.001	220.564	9.00824	0.782492	10.979	2
019_U		275.289	0.019461	0.000150026	<0.001	201.209	9.49178	0.786179	10.1429	2
021_U		109.292	0.0250905	0.000172235	0.0080569	217.754	8.88291	0.723569	11.3278	2
022_U		469.885	0.0287384	0.000177907	0.00889143	240.549	9.75286	0.710363	8.74923	2
023_U		107.988	0.0193533	0.00014282	0.00838582	206.706	9.90681	0.757345	12.4969	2
024_U		140.575	0.0299324	0.000190033	0.0024356	246.295	8.11772	0.80042	10.6785	2
025_U		720.498	0.0446962	0.000595258	<0.001	119.475	6.91818	0.830553	5.37622	2
026_U		347.279	0.0377715	0.000502489	0.0455786	117.308	8.22246	0.797127	6.85552	2
027_U		1796.07	0.568114	0.00167147	0.00670985	488.765	19.1154	0.657075	4.18135	2
028_U		2103.31	0.0200256	0.00330192	0.0317438	9.58494	9.52015	0.82168	2.85496	2
029_U		2504.72	0.624446	0.00153105	0.00176595	577.491	21.1654	0.630765	5.74708	2
031_U		284.892	0.0300847	0.000428353	0.0101357	109.335	6.54865	0.794364	7.03092	2
032_U		1114.41	0.193995	0.00116938	0.00558155	247.812	6.63865	0.721152	4.32297	2
033_U		148.491	0.0589439	0.000239753	0.0094577	360.764	8.71682	0.6898	10.5268	2
034_U		180.107	0.0171002	0.000247601	0.0142157	106.231	9.357	0.771072	9.76737	2
035_U		73633	0.297588	0.0245912	0.00114134	19.176	36.3118	0.82204	0.926386	2
036_U		200.484	0.00578027	0.000292833	0.0430567	30.9828	10.9273	0.808823	8.39105	2
037_U		924.68	0.104186	0.00222246	0.000994397	73.8634	20.8355	0.816118	5.47291	2
039_U		405.762	0.0684154	0.000641423	0.00501621	164.101	8.83213	0.773363	6.34504	2
350_U		9048.3	0.478626	0.0162706	0.019498	46.4416	7.68527	0.819612	1.46648	2
359_U		50689.8	0.637615	0.0794702	0.057238	12.704	11.255	0.824743	0.662573	2
360_U		5647.99	0.615795	0.00866008	0.0087825	109.534	5.88953	0.775177	1.91006	2
361_U		1218.49	0.108196	0.00205101	0.00968566	82.2579	8.40942	0.797174	4.08986	2
365_U		49349.4	0.544656	0.0608899	0.0386126	14.1391	8.96892	0.821333	0.72022	2
366_U		4942.79	0.0399517	0.00727661	0.0178651	8.69108	21.228	0.823854	2.47303	2
368_U		1225.91	0.0205059	0.00185932	0.058414	17.4484	8.05971	0.822677	3.47527	2
369_U		65958.5	0.251866	0.120399	0.110711	3.31985	12.9079	0.829056	0.620969	2
374_U		304.702	0.0317921	0.000537987	<0.001	92.1015	7.11993	0.794752	7.75688	2
375_U		2307.92	0.0870689	0.00261071	0.0144092	52.3659	12.1267	0.809402	4.89094	2
376_U		27934.1	0.777307	0.0320102	0.0200331	38.3505	11.2361	0.819498	0.894237	2
377_U		17604	1.00517	0.0353609	0.00507992	44.7032	10.0673	0.812659	1.00472	2
378_U		58189.4	0.631495	0.0824754	0.0117147	12.0895	15.4626	0.819454	0.615012	2
382_U		9122.01	0.930435	0.0150194	0.0071702	96.0741	5.5628	0.787457	1.52249	2
384_U		881.891	0.0185162	0.00137688	0.0985937	21.2843	18.3197	0.823987	4.46746	2
387_U		6049.04	0.319118	0.00815918	0.0100629	61.4232	13.1424	0.809656	1.8484	2
388_U		6780.78	0.515535	0.0101105	0.00757793	79.6473	11.383	0.800032	1.59162	2
389_U		6780.12	1.23641	0.0102963	0.00234631	182.895	10.6625	0.755255	2.2755	2
390_U		17236.6	0.897515	0.0281117	0.0148458	50.2692	6.204	0.814528	1.0644	2
391_U		1518.32	0.109491	0.00233211	0.00769011	74.0629	10.2181	0.817625	3.28487	2
392_U		6719.16	0.402686	0.0076267	0.00754759	82.2039	4.70785	0.793716	1.68717	2
160_U	MTO 4-4	42458.9	0.0709688	0.0326572	0.123767	3.45523	16.1432	0.832195	0.762928	2
161_U		36403.5	0.099741	0.0239735	0.0863478	6.59861	10.4785	0.827384	0.800472	2
162_U		29299.6	0.308458	0.0247453	0.119473	19.6396	14.7129	0.815698	0.808917	2
164_U		107586	0.654171	0.0642957	0.107168	16.0982	11.5321	0.822918	0.624271	2
166_U		62776	1.12572	0.055443	0.12887	32.0547	4.29291	0.819383	1.12429	2
167_U		111666	0.473848	0.118959	0.163365	6.31199	15.1486	0.826398	0.554587	2
168_U		86329.9	0.819405	0.075583	0.115331	17.0814	6.98568	0.815851	0.586705	2
169_U		361703	0.879084	0.242837	0.100141	5.7393	15.2768	0.826751	0.43293	2
170_U		635386	0.504713	0.562576	0.142016	1.42596	10.9167	0.831752	0.488336	2
171_U		124867	0.273862	0.0828088	0.109269	5.25166	15.6661	0.829592	0.553593	2
174_U		39215.3	0.668117	0.0315658	0.074826	33.1841	9.41447	0.806632	0.784901	2
177_U		51601	0.290856	0.0491274	0.109148	9.36794	8.28744	0.82357	0.715018	2
178_U		109476	1.31654	0.0791482	0.0928075	26.1616	11.4934	0.812344	0.597971	2
179_U		239957	0.795408	0.194547	0.117405	6.47435	9.4751	0.824863	0.473503	2
180_U		296212	0.92919	0.226377	0.125812	6.49841	14.9877	0.824393	0.453199	2
181_U		361123	0.982307	0.345913	0.081795	4.49702	13.004	0.825084	0.434838	2
182_U		178465	0.907368	0.115824	0.142415	12.4096	5.14549	0.825164	0.513534	2
183_U		39048.1	0.49498	0.0365348	0.0672125	21.3723	8.12866	0.818151	0.963785	2
184_U		1.04815e+06	0.647774	0.94338	0.0463665	1.08907	3.92248	0.82785	0.392384	2
185_U		102247	0.836953	0.089586	0.101457	14.759	8.06473	0.820587	0.607888	2
186_U		121692	1.03338	0.113309	0.104375	14.4033	5.0251	0.820156	0.503521	2
187_U		198711	0.617261	0.143394	2.60558	6.82642	7.36596	0.827307	0.465515	2
188_U		291589	1.15265	0.270524	0.109924	6.74267	6.30509	0.823806	0.429692	2
189_U		231299	1.12836	0.18467	0.137299	9.68671	8.51853	0.82692	0.446968	2
190_U		413220	0.810464	0.351065	0.115106	3.66515	5.59366	0.829591	0.415455	2
191_U		11917.4	0.0741231	0.00846723	0.135825	13.8373	9.44233	0.821501	1.3575	2
192_U		126152	0.95799	0.117981	0.0916465	12.835	10.549	0.821693	0.619334	2
193_U		73154.5	0.754892	0.0620209	0.286155	19.2091	10.4619	0.818688	0.85559	2
194_U		549529	0.605817	0.486613	0.132779	1.98228	11.86	0.835058	0.453937	2
197_U		51681.2	0.301709	0.0458647	0.31776	10.4061	9.61498	0.822969	0.7187	2
198_U		273244	0.678915	0.23181	0.20047	4.65829	8.99622	0.83297	0.446089	2
209_U		477618	0.836309	0.363857	0.115833	3.64558	17.3892	0.827738	0.412876	2
210_U		412526	1.02657	0.297782	0.102678	5.47112	9.21663	0.828729	0.425102	2
211_U		293172	1.01504	0.18195	0.126205	8.84299	10.7389	0.826275	0.451206	2
212_U		555903	1.12127	0.381044	0.0884707	4.67028	15.7941	0.828693	0.407281	2
213_U		76097.4	0.92329	0.0465189	0.0836026	31.1732	7.98598	0.809473	0.675131	2
214_U		346163	1.14134	0.306789	0.232627	5.89629	6.13584	0.826544	0.42947	2
215_U		120901	0.900788	0.101588	0.107634	14.0251	13.5462	0.822757	0.527249	2
217_U		262806	1.30819	0.351034	0.127	5.92094	8.30341	0.831387	0.435416	2
219_U		127957	1.04787	0.102188	0.132983	16.1693	12.9522	0.817163	0.580662	2
220_U		7919.44	0.111221	0.00410202	0.159631	42.5825	10.9854	0.809018	1.77794	2
221_U		148260	1.63965	0.134355	0.24324	19.2463	5.779	0.817526	0.481797	2
222_U		128181	1.2522	0.0942326	0.0894468	20.9633	13.3281	0.81788	0.545609	2
223_U		307635	1.50926	0.258475	0.142847	9.24665	4.33067	0.824932	0.435185	2
225_U		254729	1.63599	0.231505	0.109896	11.1914	8.6423	0.825128	0.482295	2
226_U		355548	1.29444	0.238886	0.114358	8.578	9.0534	0.824059	0.433578	2
227_U		156455	1.10491	0.135527	0.0978097	12.8905	7.54604	0.82218	0.500237	2
228_U		681461	0.667298	0.64174	0.0952683	1.65065	10.1476	0.829533	0.44845	2
229_U		95833.6	1.03343	0.0838691	0.100238	19.4375	7.66387	0.817955	0.56951	2
231_U		157487	1.26924	0.144826	0.0810774	13.8556	11.595	0.822033	0.502822	2
232_U		3039.4	0.0655591	0.00302949	0.157937	33.9629	7.14814	0.809142	2.97406	2
233_U		118467	1.98561	0.102431	0.0597711	30.5105	7.14294	0.813847	0.511257	2
234_U		133809	1.61386	0.109692	0.121243	23.1914	7.98235	0.816582	0.516267	2
235_U		168534	1.81391	0.146839	0.102627	19.4603	6.02371	0.815517	0.519986	2
236_U		220800	1.79245	0.192334	0.179616	14.7319	11.0276	0.821758	0.466878	2
237_U		246643	1.29121	0.213235	0.084156	9.59039	7.92351	0.825208	0.4568	2
238_U		379877	0.617629	0.285757	0.0885165	3.4287	31.8999	0.827991	0.435875	2
239_U		217983	0.783521	0.193253	0.107572	6.43356	14.1099	0.828702	0.486897	2
240_U		412692	0.727259	0.379039	0.066049	3.04843	11.8366	0.831051	0.449453	2
241_U		48316.5	0.505401	0.039643	0.14856	20.1386	7.66868	0.820402	0.638891	2
244_U	MTO 11-3	31009.7	0.0197532	0.0196317	2.17749	1.60494	14.392	0.836715	1.04208	2
245_U		24767.1	0.0472789	0.0297654	0.532817	2.52243	22.1668	0.829838	0.983276	2
247_U		63055	0.280048	0.0785874	0.383593	5.65911	7.24266	0.829995	0.682369	2
248_U		99921.7	0.256645	0.134352	0.530305	3.03838	5.76336	0.832941	0.54607	2
249_U		16054.1	0.0642445	0.0237389	0.594885	4.30647	7.08237	0.83377	1.07213	2
250_U		95970.6	0.198413	0.093629	0.466487	3.36015	5.40787	0.826778	0.568222	2
259_U		20406.6	0.834077	0.0257581	0.110421	50.4975	12.2112	0.79716	1.09317	2
260_U		1785.64	0.0108152	0.00283151	0.737373	6.09155	8.01415	0.837639	3.05262	2
265_U		124037	0.139251	0.100581	0.947253	2.20161	8.47269	0.831672	0.549564	2
266_U		19404.9	0.0883536	0.0209692	0.46969	6.70324	13.9171	0.833012	1.01109	2
268_U		145975	1.65729	0.211881	0.208001	12.3899	7.12001	0.825537	0.580304	2
269_U		136367	0.12219	0.189745	1.64058	1.02328	5.31062	0.831221	0.513353	2
271_U		12069.7	0.0340877	0.0182035	1.14673	2.97723	13.8723	0.832323	1.17928	2
272_U		55570.6	0.215789	0.0750775	0.452354	4.55607	5.9462	0.826719	0.647191	2
274_U		9125.64	0.0587384	0.0121313	0.554376	7.69476	10.8274	0.831178	2.15284	2
275_U		11006.7	0.0541979	0.0167865	1.22892	5.11619	6.25137	0.826169	1.2246	2
276_U		58251.5	0.0919518	0.0796486	0.544915	1.84055	15.9758	0.837309	0.665393	2
277_U		112321	0.2888	0.134181	1.16511	3.41329	8.01988	0.827374	0.547026	2
278_U		18070.1	0.0483212	0.0284313	0.753637	2.69752	7.34193	0.829183	0.930615	2
279_U		105781	0.36599	0.154012	0.693152	3.77432	6.86293	0.830412	0.541357	2
281_U		153346	3.99395	0.219998	0.0814441	28.5224	7.87581	0.81065	0.505841	2
282_U		141144	3.62722	0.204435	0.0686741	27.8975	8.64895	0.812073	0.524061	2
283_U		70728.6	0.714963	0.114333	0.146874	9.8904	4.23614	0.82285	0.589978	2
284_U		57877.8	0.276551	0.0646303	0.317542	6.81222	14.1458	0.834354	0.674126	2
285_U		179536	0.72592	0.190292	0.343067	6.07536	4.67516	0.834932	0.476329	2
286_U		201969	1.29908	0.322298	0.312962	6.38643	4.93867	0.826088	0.444077	2
287_U		374142	2.53464	0.564995	0.0545202	7.1029	7.0129	0.824709	0.422649	2
288_U		128171	3.21651	0.176097	0.0867245	28.7059	5.04744	0.811158	0.579929	2
289_U		136966	4.11806	0.183624	0.082197	35.2045	5.31686	0.809045	0.532911	2
290_U		107867	4.86374	0.157741	0.0603571	48.1722	7.66492	0.800542	0.569712	2
291_U		106011	1.9155	0.168932	0.430667	17.8989	17.5383	0.819266	0.653903	2
292_U		61587.4	4.52618	0.110664	0.0752628	63.7461	15.4013	0.796546	1.10489	2
293_U		91649.5	3.83214	0.140795	0.0428052	42.7068	5.70943	0.808397	0.582179	2
294_U		80760.3	3.78535	0.123535	0.0754831	47.8575	5.80218	0.799964	0.659482	2
295_U		67616.7	4.30186	0.106587	0.0433133	62.7537	5.61153	0.792097	0.667456	2
436_U	Pu 05	1336.45	0.00806001	0.000733005	0.0178745	17.1486	11.7837	0.796753	3.36597	2
440_U		3540.52	0.0127216	0.00211317	0.0469413	9.39619	12.0764	0.799336	3.34161	2
441_U		5778.6	0.0130085	0.00110151	0.0893311	18.4273	9.41771	0.795814	2.4365	2
442_U		819.431	0.0100044	0.000430154	0.00163257	36.2058	11.5674	0.792927	4.33565	2
444_U		3503.36	0.0024656	0.000684035	0.0584488	5.61326	14.9949	0.793114	2.68011	2
445_U		1398.4	0.00629516	0.000794424	0.0429913	12.2969	8.3952	0.788366	3.43128	2
463_U		2058.43	0.0185875	0.00144331	0.0427747	19.9181	10.0907	0.782771	3.44144	2
464_U		2092.65	0.0185171	0.00123213	0.058519	23.2963	7.52753	0.786259	2.90313	2
465_U		1187.68	0.00688812	0.000643125	0.120449	16.6212	13.4993	0.788496	4.64704	2
466_U		7719.62	0.0493637	0.00525839	0.0434319	14.5862	4.76413	0.790921	1.62361	2
467_U		2651.89	0.0319039	0.00187197	0.0324354	26.3561	15.0953	0.782224	3.58541	2
468_U		51096.6	0.312296	0.0304542	0.045477	15.942	4.36268	0.791757	0.652637	2
469_U		39482.9	0.301084	0.0243112	0.133802	19.2216	4.69995	0.788855	0.765934	2
470_U		18989.7	0.23196	0.010667	0.0305286	33.646	6.11445	0.783226	0.956398	2
472_U		77383.9	0.557628	0.0461824	0.0220257	18.7794	4.98024	0.792509	0.583457	2
473_U		42752.8	1.1833	0.0289614	0.0135919	62.4598	7.52894	0.76216	0.784833	2
474_U		38266.8	0.505862	0.0262791	0.0170862	29.8463	11.936	0.787053	0.976467	2
475_U		6462.26	0.250737	0.00413798	0.00989793	92.204	9.62863	0.753837	2.29901	2
476_U		55481.8	0.927587	0.039217	0.0918979	36.6967	9.79494	0.788355	0.886236	2
477_U		24674.3	0.114256	0.0159228	0.046822	11.1864	4.72594	0.79682	1.00254	2
478_U		2847.36	0.0745206	0.00152557	0.00679209	74.3672	12.0788	0.754398	2.43604	2
479_U		70165.1	0.516349	0.0450662	0.0787162	17.8005	6.71204	0.79057	0.595573	2
480_U		184870	0.877027	0.115162	0.0687425	11.873	3.84643	0.796822	0.478668	2
481_U		11662.1	0.616107	0.00800096	0.00931868	115.919	7.64056	0.735227	1.20382	2
483_U		1829.32	0.0135145	0.00133063	0.0297306	15.8382	10.8896	0.797069	3.17137	2
486_U		652.457	0.00339233	0.000603332	0.031734	8.74875	21.5721	0.794111	5.4524	2
487_U		97239.1	1.43741	0.0602341	0.0189233	36.734	4.59016	0.774154	0.565982	2
488_U		12859.8	0.701197	0.00863596	0.00606138	122.159	8.94449	0.734257	1.35539	2
489_U		22723.1	0.838964	0.0141379	0.0113307	89.9354	4.92842	0.746793	0.928026	2
490_U		39876.9	0.509807	0.0259463	0.0130291	30.4208	6.13013	0.784448	0.814293	2
491_U		30829.6	1.03243	0.0136049	0.0161809	114.379	16.1423	0.736829	0.908299	2
492_U		19082.2	1.01719	0.0143111	0.0131557	106.887	10.361	0.733543	1.05096	2
009_U	MTO 11-3	90036.1	2.88127	0.285784	0.13504	31.5363	10.2602	0.805361	0.652031	3
010_U		60711.4	4.84987	0.189275	0.0575033	80.092	4.59241	0.778448	0.731228	3
011_U		321269	3.0778	0.970011	0.36296	10.2514	6.63982	0.820677	0.401458	3
012_U		18889.5	1.81722	0.060633	0.0805092	92.3931	6.48668	0.771541	1.07052	3
013_U		104308	1.9547	0.318297	0.118079	20.0116	8.70735	0.813375	0.494472	3
014_U		49427.2	2.39239	0.129929	0.0757432	72.22	10.6377	0.778839	0.991723	3
015_U		140824	4.30668	0.43266	0.139573	32.0743	4.33715	0.805415	0.499543	3
017_U		107005	3.59099	0.335112	0.0828935	34.0983	5.48656	0.81025	0.54463	3
018_U		63649.5	0.604411	0.190657	0.298784	10.7372	7.28152	0.82075	0.601708	3
024_U		112992	0.54759	0.350869	0.924872	5.07663	9.45294	0.827936	0.48488	3
025_U		148314	0.567341	0.445699	0.766649	4.29416	8.97893	0.827739	0.437494	3
028_U		148368	3.08476	0.398906	0.114767	29.4535	11.0399	0.8088	0.602518	3
031_U		54347.1	2.14945	0.166494	0.0746298	42.5546	8.46008	0.796756	0.756344	3
033_U		158602	3.34132	0.495064	0.230283	21.7206	4.88879	0.814219	0.446482	3
034_U		47147.2	0.311101	0.138905	0.381696	7.79081	5.87324	0.823917	0.659922	3
035_U		161917	3.18051	0.504658	0.344621	20.4373	5.50085	0.816718	0.423352	3
037_U		245790	3.16601	0.676134	0.232727	17.0776	6.68119	0.814916	0.469226	3
038_U		152560	4.57493	0.482621	0.138288	30.0464	6.2308	0.804779	0.5356	3
040_U		45567	2.23722	0.142285	0.112865	50.7015	5.53999	0.796128	0.68364	3
041_U		43415.7	0.348823	0.135506	0.429439	8.46378	8.02636	0.820752	0.937758	3
042_U		41614.3	0.274131	0.12928	0.39333	7.03854	7.34344	0.827582	0.765529	3
043_U		51784.2	0.317109	0.158345	0.428374	6.70497	5.49879	0.818373	0.666952	3
044_U		185745	3.98995	0.534306	0.191197	26.1522	8.69935	0.80853	0.457166	3
045_U		197622	1.59118	0.576115	0.115444	9.50288	17.5367	0.822367	0.451566	3
046_U		163159	3.23352	0.520308	0.14771	19.5889	7.088	0.812879	0.5217	3
047_U		137303	3.2103	0.453194	0.1677	21.7821	5.96845	0.814042	0.540864	3
048_U		74586.3	3.54404	0.237774	0.0979992	47.1437	5.66042	0.799183	0.632037	3
049_U		142496	4.40542	0.449072	0.136543	31.2925	4.47468	0.806688	0.434639	3
050_U		148349	4.80544	0.44549	0.140335	36.3513	6.61885	0.806636	0.512839	3
059_U		102822	2.98649	0.322744	0.183521	30.0448	6.16488	0.803576	0.512453	3
061_U		125428	3.18657	0.398128	0.156508	25.592	6.90924	0.81084	0.469462	3
062_U		37071.5	1.05347	0.130992	0.13224	23.3794	9.82783	0.809842	0.755866	3
063_U		48032.4	0.784918	0.156131	0.123621	15.9002	6.2785	0.81799	0.708595	3
064_U		69241.8	0.511335	0.208867	0.575179	8.44178	13.2358	0.820349	0.626219	3
065_U		165434	4.11994	0.511011	0.0604213	26.3406	9.20356	0.809568	0.534812	3
066_U		134214	5.47668	0.422595	0.08491	41.6613	9.20095	0.79824	0.549104	3
067_U		35031.7	3.46798	0.115276	0.0506295	91.671	4.71354	0.764225	0.823152	3
068_U		197102	2.77696	0.647791	0.166238	13.2082	5.15954	0.820361	0.40472	3
069_U		152700	2.85534	0.456793	0.12078	21.2972	17.4164	0.814724	0.568045	3
071_U		108748	0.34226	0.353705	1.35053	3.08079	9.51906	0.826587	0.524634	3
072_U		170691	0.850518	0.54855	0.592474	4.9461	10.5614	0.829179	0.518852	3
073_U		9934.74	1.67312	0.0323791	0.0683717	155.203	6.9935	0.722756	1.5312	3
074_U		92588.3	5.49294	0.297975	0.0594877	58.0965	9.88617	0.792927	0.766252	3
009_U	Pu 05	2166.99	0.0296084	0.00162394	0.00450981	64.3954	16.511	0.76205	3.1161	4
011_U		641.696	0.0025564	0.000604929	0.0183374	12.1456	15.7715	0.830438	6.18446	4
013_U		2052.54	0.00245125	0.0017165	0.0624349	4.61173	6.5644	0.817664	2.75063	4
014_U		550.239	0.0112845	0.000452586	0.00517627	75.7242	18.2593	0.770544	6.98106	4
015_U		1350.95	0.0274918	0.00121759	0.000674457	67.0677	8.4887	0.770542	3.45554	4
016_U		7080.9	0.101604	0.00571397	0.0153253	56.4643	7.60841	0.763197	1.55745	4
017_U		2027.13	0.0635192	0.00158745	0.0088463	132.757	9.77883	0.741142	2.81198	4
018_U		1355.25	0.051177	0.00119283	0.00417972	127.11	14.6442	0.747515	3.5179	4
019_U		9372.14	0.102224	0.00652676	0.0178221	63.0937	8.61991	0.78239	2.20889	4
020_U		2028.07	0.0153582	0.0017523	0.0126247	26.9993	6.879	0.782515	3.03663	4
021_U		3007.58	0.0110837	0.00222156	0.003724	18.4594	5.14349	0.812033	2.75453	4
022_U		1139.67	0.00520722	0.00110664	0.00980268	13.1936	19.4133	0.794861	4.36858	4
023_U		1050.8	0.0325664	0.000973719	0.00288119	94.7141	16.1528	0.75257	4.82621	4
025_U		4315.63	0.0585079	0.0035707	0.00711139	51.9621	13.6328	0.77939	1.93722	4
026_U		7480.74	0.0499439	0.00650834	0.0224215	23.3864	9.36224	0.789129	1.6401	4
027_U		6386.79	0.0284229	0.00616836	0.0104928	12.9299	17.9074	0.795106	1.66892	4
028_U		12430.5	0.0232027	0.0110949	0.00183469	6.38902	13.6211	0.830402	1.34164	4
029_U		1118.49	0.0231873	0.000961842	0.00701894	73.4911	9.61367	0.755271	4.75914	4
030_U		1099.27	0.00377753	0.00145531	0.000343021	6.03883	34.774	0.815864	3.77882	4
031_U		2455.98	0.00332088	0.00212091	0.0286732	4.92019	11.0484	0.812015	2.5289	4
032_U		8610.48	0.0565029	0.00666316	0.0422806	29.3917	9.72965	0.798917	1.7618	4
033_U		2450.02	0.00597771	0.00215945	0.086405	8.35545	7.49352	0.802926	3.89011	4
034_U		1943.35	0.0101632	0.00149192	0.0289934	22.8854	6.71207	0.804688	3.25756	4
037_U		1471.07	0.0103201	0.00133088	0.0140625	23.4028	11.8929	0.800531	4.02003	4
038_U		4240.5	0.0567209	0.00289949	0.00768543	79.2878	9.49674	0.779566	2.36309	4
040_U		5568.55	0.0393507	0.00474821	0.0488743	25.9474	6.16332	0.803887	1.77698	4
041_U		2788.7	0.00848288	0.00244356	0.01523	10.4784	20.3452	0.809941	2.25608	4
042_U		2271.52	0.0222566	0.00190643	0.00713958	35.6354	20.0837	0.808298	2.88988	4
043_U		844.645	0.00582651	0.000907573	0.0165313	16.9204	19.7128	0.801993	4.47872	4
044_U		1053.01	0.00183206	0.0007778	0.045847	8.58702	14.8581	0.813515	3.71781	4
045_U		2058.5	0.0035269	0.00180278	0.0228844	6.06999	8.06232	0.814298	2.8002	4
046_U		1004.01	0.00322829	0.000780395	0.0180224	14.5601	9.86727	0.797325	3.83829	4
047_U		1329.21	0.0158039	0.0011987	0.000774044	33.8102	31.443	0.801167	3.7069	4
048_U		1422.46	0.0214945	0.00133709	0.00601836	45.2361	15.4545	0.781018	3.07651	4
049_U		276573	1.22956	0.163263	0.0493124	37.3587	11.5025	0.788376	0.55732	4
060_U		1411.03	0.00608774	0.0012457	0.00534133	14.9965	12.0268	0.811692	3.04358	4
061_U		7356.02	0.0900067	0.00477574	0.0841342	81.0077	27.2159	0.753775	2.13207	4
062_U		1434.78	0.0428057	0.00117674	0.00638715	116.973	13.9749	0.727701	3.2201	4
064_U		632.862	0.0557434	0.000647765	0.00103048	219.227	23.1556	0.67834	5.82081	4
067_U		108576	0.655989	0.0938162	0.0193321	21.2366	4.20409	0.800699	0.553077	4
068_U		22860.5	0.233334	0.0193906	0.0168964	37.2538	4.53612	0.790582	0.912469	4
073_U		2090.56	0.136335	0.00188725	0.00209201	199.105	9.70367	0.680468	3.26871	4
075_U		747.621	0.00729416	0.000715885	0.00329562	29.0852	17.9354	0.804267	4.77472	4
078_U		1315.56	0.0606981	0.00115531	0.00227539	150.731	8.95981	0.733792	3.69181	4
079_U		2404.79	0.0440892	0.00214986	0.00560157	60.4029	14.6684	0.785373	2.47555	4
080_U		2285.09	0.032106	0.00206622	0.00466812	46.3236	13.133	0.793348	2.82646	4
081_U		2197.94	0.0397771	0.00173424	0.0113962	78.1873	6.20265	0.754129	2.48472	4
088_U	MTO 4-4	154270	1.50267	0.234135	0.236297	22.9436	8.5788	0.812768	0.506134	4
089_U		66592.5	1.01601	0.10779	0.075442	31.3465	8.27913	0.804957	0.639148	4
092_U		25817.9	0.937393	0.0425391	0.144541	72.1401	9.47269	0.786731	1.25004	4
093_U		188855	1.52195	0.290405	0.149934	18.2818	11.5298	0.813617	0.448644	4
094_U		70716.5	1.5316	0.116864	0.0989739	42.6642	3.34487	0.797073	0.676899	4
095_U		392652	1.32055	0.684678	0.141356	5.79885	17.3837	0.824439	0.396972	4
096_U		39333.4	0.54237	0.0654705	0.142645	27.0156	9.69376	0.810741	0.723733	4
098_U		343014	0.638752	0.576149	0.333118	3.4865	8.98698	0.830151	0.428383	4
099_U		15397.2	0.082856	0.0269458	0.356233	9.61938	12.4473	0.819548	1.20105	4
100_U		35522.3	0.270964	0.0599515	0.23915	14.6484	4.48109	0.815955	0.78324	4
109_U		202639	1.56383	0.337492	0.0811373	14.6307	19.0204	0.814138	0.574189	4
110_U		42283.3	0.701979	0.0689029	0.0826168	33.8675	5.63644	0.805018	0.7529	4
111_U		112583	1.45689	0.186085	0.0986229	25.5238	9.23374	0.808759	0.503906	4
112_U		120520	0.703535	0.209533	0.0432186	10.4369	16.2239	0.822627	0.539145	4
113_U		4129.34	0.17463	0.0071623	0.0673163	75.4407	9.67596	0.783574	2.2901	4
114_U		64831.4	0.234958	0.115749	0.0508195	6.23302	6.33115	0.826985	0.628305	4
115_U		386587	2.33593	0.634992	0.0611067	11.8032	8.58466	0.820435	0.363505	4
116_U		101833	0.0588558	0.180901	0.585232	1.00767	20.2964	0.832795	0.507011	4
117_U		36663.7	0.0227691	0.0660065	0.930894	1.06287	20.7467	0.826234	0.797398	4
118_U		263914	1.53169	0.447137	0.110316	10.7228	10.4264	0.82036	0.417061	4
119_U		198490	1.03695	0.327205	0.156507	10.3186	10.2286	0.81987	0.462378	4
120_U		321214	1.30904	0.540781	0.0993505	7.66214	5.1411	0.824064	0.377619	4
121_U		77902.7	0.530777	0.134202	0.0462181	12.5585	6.28518	0.820847	0.639963	4
122_U		477392	1.07864	0.814536	0.132896	4.03979	11.3712	0.825813	0.429058	4
123_U		62459.2	0.840128	0.105595	0.0892674	25.601	12.3797	0.814272	0.662739	4
124_U		83446	0.446103	0.142447	0.129681	9.87461	14.1719	0.815146	0.561453	4
125_U		328913	0.85935	0.534531	0.113841	5.21607	11.4693	0.826661	0.38013	4
126_U		51256.8	1.21007	0.0800297	0.0822156	53.1864	6.5206	0.794805	0.880055	4
127_U		165366	1.15863	0.282042	0.0936652	13.0534	6.33356	0.819871	0.435042	4
128_U		128085	0.780752	0.235932	0.13568	9.82546	15.3078	0.820886	0.482507	4
129_U		40122.4	0.479976	0.0681413	0.0761685	22.5447	8.61868	0.812321	0.720654	4
130_U		243432	1.57671	0.399281	0.111873	12.9066	8.94717	0.818214	0.412195	4
131_U		410018	1.04031	0.631612	0.097972	5.56561	9.64129	0.825249	0.384098	4
132_U		453513	1.28697	0.754255	0.107735	5.29513	13.4221	0.82251	0.388092	4
133_U		140762	1.00811	0.22983	0.102305	14.5416	10.4841	0.820534	0.449823	4
134_U		171451	1.84633	0.254322	0.113861	27.0722	5.90894	0.810975	0.492806	4
135_U		299485	1.34159	0.497905	0.0879029	8.64642	7.30304	0.825303	0.400896	4
136_U		273271	0.953702	0.455896	0.12631	6.74219	7.54551	0.825471	0.38268	4
137_U		261422	0.996393	0.438724	0.167249	7.25098	8.77895	0.821877	0.396498	4
139_U		336303	1.18836	0.564278	0.19877	6.7301	13.7818	0.827659	0.377491	4
140_U		91663.6	0.343933	0.154	0.107708	7.22974	14.7158	0.824232	0.508992	4
141_U		2832.85	0.130627	0.00461299	0.157995	98.3941	7.07193	0.772716	3.38497	4
143_U		178759	0.871247	0.302747	0.088642	9.14227	10.232	0.823338	0.443355	4
144_U		175078	1.1222	0.301355	0.100907	11.6673	17.9779	0.818646	0.500308	4
145_U		190119	1.22114	0.304359	0.111646	13.4593	8.65605	0.817759	0.462787	4
146_U		85820.3	1.43216	0.150078	0.220936	30.2021	3.52625	0.80811	0.623994	4
147_U		329223	0.75275	0.550022	0.140289	4.28076	9.45075	0.825376	0.400695	4
148_U		114269	1.13968	0.195381	0.0943648	18.1607	8.52515	0.814157	0.532533	4
149_U		248241	1.10138	0.420565	0.103233	8.31197	8.29929	0.821516	0.411666	4
150_U		181792	0.918071	0.277747	0.099529	11.6606	9.96162	0.819161	0.46932	4
159_U		122725	0.83084	0.210496	0.167834	12.5884	5.36195	0.821134	0.48282	4
160_U		126548	0.89535	0.218902	0.101883	12.6781	8.28974	0.821404	0.501668	4
161_U		110684	1.90795	0.172712	0.085766	39.0605	4.55751	0.801696	0.576208	4
162_U		78280.3	1.21375	0.130054	0.0915063	30.2556	7.05774	0.804856	0.709302	4
165_U		195480	1.03797	0.338145	0.0921319	9.68611	9.01535	0.820929	0.440877	4
166_U		303135	1.28642	0.486426	0.114619	8.74418	7.70757	0.824108	0.403622	4
169_U		62162.9	0.869244	0.114366	0.0792752	22.9039	9.6798	0.816027	0.624641	4
170_U		124538	1.14769	0.2093	0.0929636	17.9416	7.91811	0.817368	0.448539	4
171_U		156199	1.32732	0.268454	0.0886445	15.7757	12.5138	0.816789	0.457267	4
172_U		58089.9	0.922944	0.093866	0.0902511	33.5308	7.64766	0.804875	0.629941	4
173_U		88433	1.54155	0.136962	0.102021	40.4869	7.86351	0.798231	0.533054	4
175_U		70717.4	1.05195	0.109253	0.0996484	34.9648	6.12637	0.804779	0.711669	4
176_U		115260	1.18984	0.14733	0.0986204	39.4199	5.04861	0.801791	0.748073	4
177_U		35514.1	0.818693	0.058008	0.0791346	47.4202	5.3201	0.79828	0.799231	4
178_U		60005.6	1.45146	0.0904545	0.0947543	59.0566	8.49951	0.787745	0.765075	4
179_U		263568	1.71488	0.45437	0.0914433	11.8097	9.8105	0.8172	0.510141	4
180_U		237512	1.15501	0.376256	0.0891999	10.3589	25.6522	0.820222	0.525142	4
181_U		79587.3	1.0217	0.1353	0.117823	24.3876	5.73218	0.80988	0.564645	4
182_U		181676	1.49314	0.311715	0.156469	15.235	8.55671	0.817936	0.491811	4
183_U		148496	0.618867	0.385238	0.154539	3.82797	6.36423	0.825568	0.421671	4
184_U		338583	1.74274	0.592451	0.0674941	9.1167	8.78079	0.825602	0.389584	4
185_U		79508.1	1.06614	0.133565	0.065281	26.541	4.05459	0.814338	0.555702	4
186_U		85235.9	0.729349	0.147642	0.0890037	15.827	9.94185	0.817037	0.538253	4
187_U		307851	1.00747	0.532258	0.256202	5.90405	12.8494	0.819107	0.432639	4
188_U		116771	1.08874	0.207776	0.0868215	16.2459	10.6589	0.814052	0.530124	4
280_U	BOX 108	3723.49	0.0273673	0.0150157	0.0175893	4.20952	34.4873	0.840505	2.45457	4
283_U		215245	2.45096	0.517963	0.119166	19.7613	7.36726	0.82403	0.470155	4
284_U		95417	1.12219	0.281333	0.143265	13.0449	4.93953	0.825851	0.510992	4
287_U		9848.92	1.32943	0.0300579	0.0332718	133.6	4.04132	0.74706	1.45193	4
288_U		11287.5	1.47727	0.0354016	0.0415386	124.235	4.89046	0.749319	1.58183	4
289_U		34193.7	0.096168	0.0993858	0.219081	3.18486	12.6779	0.834377	0.810465	4
290_U		242588	2.00999	0.719534	0.184089	8.86702	7.56689	0.830728	0.41912	4
291_U		142226	1.26622	0.403475	0.106261	10.5584	11.717	0.832092	0.445749	4
292_U		205563	1.76859	0.515479	0.114461	13.3225	8.79415	0.823124	0.443295	4
293_U		174825	1.01762	0.406635	0.0537416	10.9958	17.9724	0.830458	0.447001	4
294_U		155002	1.84114	0.441355	0.145422	14.0687	3.53209	0.824768	0.458091	4
296_U		135623	1.39825	0.33693	0.25416	16.6899	9.91478	0.825189	0.4728	4
297_U		431598	1.32832	1.08716	0.343561	4.62285	9.71362	0.829336	0.373962	4
298_U		73380.1	1.77631	0.219238	0.0272134	26.057	9.66618	0.818637	0.581142	4
299_U		285598	2.66017	0.756691	0.0123213	12.4522	7.56829	0.829099	0.431003	4
300_U		177111	1.40785	0.514053	0.144247	8.97171	12.7822	0.824545	0.460652	4
309_U		20078.3	0.0823074	0.061434	0.234331	4.3676	34.1445	0.841512	1.43358	4
311_U		162504	1.20498	0.494745	0.136049	7.59216	12.8238	0.827446	0.503135	4
312_U		300617	2.13699	0.885003	0.223843	7.67313	8.47595	0.830458	0.42269	4
313_U		4524	0.0351238	0.0133749	0.061031	8.58118	14.1839	0.828605	2.22868	4
314_U		149794	0.97539	0.415974	0.164006	8.13205	5.75576	0.827799	0.464694	4
315_U		151082	2.8238	0.452565	0.152035	20.2508	3.90664	0.82077	0.449199	4
316_U		403090	4.96498	1.19214	0.0663306	13.0226	7.6786	0.829872	0.411831	4
317_U		66022.5	1.64515	0.204449	0.146227	25.4014	4.3817	0.813223	0.621721	4
318_U		69900.6	1.32154	0.205149	0.101399	21.3167	14.5365	0.818972	0.615604	4
319_U		43920.6	2.70702	0.128882	0.0623548	68.5416	9.69611	0.792141	0.7891	4
320_U		95589.3	0.987723	0.295987	0.257089	10.4566	3.49899	0.827416	0.489385	4
321_U		86168.1	0.842375	0.261695	0.207966	10.38	11.1133	0.832378	0.535635	4
322_U		45837.4	0.386995	0.125517	0.0793056	11.0361	8.64526	0.824804	0.703806	4
323_U		81815.7	1.12146	0.245405	0.143844	14.8861	3.82239	0.823372	0.60876	4
324_U		291563	2.13471	0.879627	0.107905	7.57057	15.5869	0.827531	0.442515	4
325_U		54488	2.47642	0.166937	0.0656314	46.7377	9.15445	0.801702	0.663179	4
326_U		166955	1.60812	0.505364	0.0353515	10.1739	4.98074	0.826819	0.481419	4
327_U		378811	0.729539	1.10304	0.178307	2.13195	9.77033	0.838046	0.404922	4
328_U		125856	2.63401	0.402787	0.0351181	19.4869	19.5828	0.825657	0.643237	4
330_U		157915	2.03025	0.44555	0.0735137	15.7253	9.25428	0.824413	0.483151	4
331_U		245854	1.81609	0.664206	0.291613	9.85045	7.85208	0.821025	0.578221	4
332_U		47905.5	0.410004	0.12467	0.146472	12.5865	9.91048	0.827629	0.759488	4
333_U		566996	4.64277	1.67277	0.115413	8.63952	8.95015	0.829542	0.377803	4
334_U		84561.7	1.24081	0.251708	0.0964928	16.1691	3.20417	0.82156	0.552788	4
335_U		66581	1.77347	0.192531	0.124068	31.101	8.78419	0.812586	0.639386	4
336_U		192058	3.33908	0.544188	0.0562087	21.0282	5.78981	0.823817	0.4353	4
337_U		82708	1.69498	0.250206	0.140285	21.9422	5.41882	0.823855	0.504218	4
338_U		99826.8	2.0543	0.30171	0.191204	22.0161	6.92744	0.819391	0.50718	4
339_U		49540.5	1.61246	0.153285	0.0908557	33.0786	11.2066	0.811028	0.652853	4
340_U		209779	1.54482	0.608534	0.142858	8.328	28.1355	0.829851	0.485575	4
341_U		93794.5	0.903106	0.264632	0.0863203	11.9618	6.93907	0.825564	0.509915	4
342_U		44297	1.57732	0.11775	0.0514285	50.3405	4.97453	0.797609	0.80642	4
343_U		16242.5	0.0252154	0.0491043	0.356055	1.66355	30.3573	0.843089	1.25414	4
344_U		74235.1	0.349641	0.212947	0.297218	5.54446	4.76568	0.830639	0.536722	4
345_U		195664	1.34281	0.536287	0.111541	8.88891	6.36128	0.826133	0.436807	4
346_U		48142.8	0.611513	0.116514	0.148884	22.8087	3.84752	0.822753	0.729713	4
348_U		71995.9	0.591028	0.197884	0.0943982	10.7881	4.16529	0.829518	0.566737	4
349_U		102507	1.1164	0.302896	0.258543	12.2351	14.6687	0.825304	0.495035	4
350_U		198463	2.49649	0.507597	0.0353842	18.7561	9.29951	0.826057	0.435604	4
359_U		8939.45	0.042524	0.0242959	0.445943	6.14447	26.9685	0.832356	1.64128	4
360_U		57032.6	0.975309	0.174098	0.237665	18.0831	9.62213	0.82282	0.608964	4
361_U		203520	4.28274	0.618275	0.0692979	22.0124	11.6168	0.820408	0.399593	4
362_U		35762.5	2.8572	0.110457	0.0378326	80.5964	6.39308	0.784819	0.832016	4
364_U		79344.9	1.38069	0.245344	0.082762	17.8209	4.71616	0.822797	0.530506	4
365_U		39697.1	2.21656	0.12004	0.096469	59.4816	4.73231	0.797372	0.705721	4
366_U		144201	0.817426	0.433519	0.118146	6.09311	15.8509	0.832126	0.458874	4
367_U		53471.5	0.686789	0.163507	0.0881105	13.4822	8.21479	0.825363	0.66968	4
369_U		50693	2.48093	0.158467	0.102224	49.2527	7.42728	0.797513	0.741746	4
370_U		52832.9	2.37381	0.165349	0.0759445	44.6875	6.26521	0.807755	0.593102	4
371_U		51178.7	0.823564	0.156297	0.111699	16.6406	13.5528	0.817246	0.799641	4
372_U		14846.6	0.277423	0.0396941	0.050383	25.518	12.3454	0.81501	1.32992	4
373_U		67994.9	0.551693	0.204882	0.0834907	8.70108	13.0119	0.8239	0.637022	4
374_U		169346	1.33126	0.471941	0.106472	9.98484	12.0918	0.827948	0.445285	4
375_U		73258.3	1.44396	0.233248	0.112682	19.1007	10.2696	0.819886	0.559941	4
376_U		30039.3	0.421216	0.0973511	0.076913	13.1051	14.0962	0.821981	0.774768	4
377_U		243980	1.92046	0.749706	0.153516	8.1143	4.62113	0.831038	0.404234	4
378_U		28837.9	1.62081	0.0886685	0.0845717	58.1145	5.31712	0.796592	0.949406	4
379_U		106946	2.59647	0.330583	0.0393168	24.8708	5.05197	0.813088	0.559474	4
380_U		64980.8	2.55607	0.191691	0.101991	44.1595	5.68225	0.800119	0.621648	4
381_U		82317.7	2.08411	0.210032	0.0905688	39.3318	12.5405	0.807177	0.724666	4
382_U		78516.4	1.26701	0.238647	0.0983597	16.9988	12.1123	0.819194	0.592675	4
383_U	BCR 9644	22865.1	0.860725	0.0640705	0.0235684	47.5586	5.14059	0.805632	0.966163	4
384_U		6643.75	0.841524	0.0190721	0.00399477	146.913	11.2443	0.772425	1.96972	4
386_U		77128	0.273889	0.221616	0.201268	4.26494	4.112	0.825584	0.545565	4
388_U		3416.26	0.405271	0.0106153	0.0157966	114.634	4.84065	0.768926	2.2466	4
390_U		18463.3	0.329422	0.0582211	0.075391	17.528	12.2327	0.806087	1.01971	4
392_U		4304.73	0.136978	0.00780052	0.0033331	180.591	12.649	0.757409	3.82828	4
393_U		14387.6	1.25737	0.0436997	0.0161429	91.4431	5.79821	0.781608	1.21016	4
394_U		18495.5	0.919157	0.0539344	0.0193859	57.0463	5.92616	0.794308	1.0556	4
395_U		4427.51	0.196663	0.0121694	0.0411231	58.7925	5.9031	0.800207	1.96369	4
396_U		12558.6	0.812473	0.0316551	0.0156789	104.324	5.40309	0.778804	1.53998	4
397_U		1342.17	0.587413	0.00437144	0.00246076	376.045	8.96708	0.68745	4.73968	4
399_U		146754	0.197501	0.316494	0.109735	3.46943	6.12452	0.826038	0.547246	4
409_U		11621.5	0.410721	0.0345491	0.0183414	39.8181	11.1478	0.811736	1.52285	4
411_U		5627.25	0.482965	0.0177711	0.0207869	84.3514	7.85946	0.791687	1.7859	4
412_U		23356.9	1.13408	0.0658557	0.0376164	60.1127	6.66266	0.802851	0.96704	4
413_U		14314.1	0.220646	0.0406236	0.0608308	19.0353	14.6813	0.815106	1.18989	4
415_U		6924.49	0.055701	0.0136857	0.154779	29.9596	8.07901	0.801375	4.28618	4
416_U		6827.62	0.173632	0.020266	0.0259245	28.7987	8.19489	0.826577	1.69158	4
423_U		4952.17	0.0904847	0.0126248	0.0266019	28.7186	6.202	0.800925	2.2035	4
427_U		962.171	0.0467075	0.00325375	0.101921	42.1806	11.448	0.80556	4.04656	4
433_U		732.893	0.302321	0.00209961	0.00126524	444.779	11.599	0.689781	6.09226	4
435_U		3290.32	0.0250416	0.00629457	0.00209571	35.9402	17.1487	0.826239	4.55674	4
438_U		1004.22	0.075634	0.00314512	0.0346517	74.3712	9.65672	0.796481	4.10573	4
440_U		891.239	0.00723375	0.00270942	0.0249702	8.70416	10.0694	0.818853	4.35902	4
441_U		3305.55	0.47038	0.0104006	0.00188306	138.971	5.63698	0.783157	2.06082	4
442_U		1781.59	0.176043	0.00539216	0.00240885	103.896	4.56876	0.79079	3.01351	4
443_U		1875.9	0.104526	0.00530696	0.00176854	68.2743	5.5384	0.808439	2.93706	4
445_U		892.014	0.00859642	0.00328141	0.739053	7.25862	20.7405	0.835657	4.28606	4
446_U		5382.78	0.204041	0.0166393	0.00961301	39.5042	8.48905	0.810982	1.61163	4
447_U		5316.47	0.362217	0.0162088	0.00556661	72.0001	3.77629	0.81049	1.68696	4
448_U		4019.01	0.438089	0.012612	0.00556191	107.787	7.49069	0.785083	3.28949	4
449_U		838.501	0.156343	0.00234014	0.00453315	235.854	9.57883	0.754609	4.47749	4
450_U		27341.7	1.50493	0.0842085	0.0404097	56.1696	8.42629	0.808794	1.04512	4
459_U		5279.72	0.173721	0.0169473	0.0159364	31.9109	18.6992	0.816079	1.65408	4
462_U		37636.3	0.0620402	0.11448	0.225983	1.77808	9.17758	0.825369	0.797587	4
464_U		200339	2.30949	0.614565	0.0497694	11.7738	6.92025	0.813977	0.431217	4
467_U		676.084	0.00543789	0.00194464	0.739653	9.94975	9.01046	0.812599	5.21044	4
468_U		1807.65	0.0595316	0.00561101	0.0134102	33.8088	11.4789	0.812823	2.96679	4
469_U		3922.74	0.127606	0.0130043	0.17446	29.069	14.6101	0.805627	2.07211	4
Reference Materials
RM0
001_A	NIST	157520	0.837806	1.09588	0.905624	1.24	0.297841	0.8695	0.179001
002_A	NIST	154987	0.818632	1.07668	0.911943	1.236	0.360408	0.8736	0.161571
051_A	NIST	148835	0.799359	1.04485	0.908683	1.24	0.401394	0.8686	0.191002
052_A	NIST	151652	0.809512	1.06377	0.910914	1.234	0.337155	0.8695	0.196987
101_A	NIST	157045	0.842225	1.10387	0.905459	1.24	0.331453	0.8734	0.118335
102_A	NIST	157951	0.845745	1.11083	0.908008	1.238	0.395947	0.8737	0.143487
151_A	NIST	147390	0.813988	1.05581	0.911003	1.251	0.408749	0.8701	0.155348
152_A	NIST	153191	0.826314	1.09633	0.911984	1.223	0.460925	0.8694	0.151956
201_A	NIST	144289	0.805379	1.05378	0.904645	1.242	0.398966	0.8722	0.183315
202_A	NIST	146403	0.816592	1.07152	0.909274	1.236	0.311399	0.8693	0.172836
229_A	NIST	144941	0.81187	1.06193	0.909942	1.242	0.442344	0.8723	0.169517
230_A	NIST	151769	0.84858	1.11655	0.909321	1.233	0.373951	0.8704	0.15652
		151331	0.823	1.07932	0.9089	1.23792	1.0749	0.871	0.436884
RM1
003_B	WC	6498.68	3.64989	0.144475	0.000924283	23.77	2.60576	0.08674	1.92044
004_B	WC	7749.09	3.33139	0.139349	0.000529492	22.97	2.6222	0.1097	1.9929
053_B	WC	5834.49	2.9779	0.120492	0.000475547	23.4	2.62983	0.09389	1.44395
054_B	WC	7386.08	3.93708	0.157132	0.00150318	23.68	2.59555	0.09171	1.76968
103_B	WC	6790.37	2.48331	0.109294	0.00240034	22.11	2.6183	0.1241	1.89835
104_B	WC	5741.34	3.83101	0.145031	0.00144695	24.61	2.5987	0.07643	1.35244
153_B	WC	5625.53	3.06525	0.123127	0.000529722	23.47	2.66541	0.08929	3.47916
154_B	WC	5840.9	3.56733	0.141207	0.00112934	23.64	2.58205	0.08119	1.30289
203_B	WC	6243.54	2.33525	0.102022	0.00136038	22.4	2.85116	0.1304	7.65435
204_B	WC	6492.36	2.98744	0.126053	0.00193046	22.68	2.62801	0.1056	2.0206
231_B	WC	6459.1	3.40154	0.135808	0.00177526	23.8	2.60021	0.09783	1.55859
232_B	WC	5611.56	3.38657	0.133182	0.00115706	23.88	2.60603	0.08501	1.49896
RM2
005_C	B-6	1012.91	0.386723	0.00576487	0.00232782	82.32	5.41428	0.4155	4.87936
006_C	B-6	516.287	0.080317	0.00171121	0.00378794	63.36	11.1748	0.5552	8.33933
055_C	B-6	518.129	0.0135045	0.00127498	0.0220037	16.73	21.6058	0.8203	7.44302
056_C	B-6	1232.19	0.338796	0.00535663	0.000976579	79.58	8.67097	0.4511	7.82882
105_C	B-6	1144.84	2.96397	0.0208715	0.000107025	136.3	3.96473	0.1084	8.91275
106_C	B-6	2369.5	2.80858	0.0240997	0.0122622	120.7	4.52905	0.1953	10.2542
155_C	B-6	573.073	0.289334	0.00354791	<0.001	93.48	8.87716	0.3226	11.1747
156_C	B-6	716.905	1.4588	0.0107262	0.000882831	134	3.04864	0.138	5.03587
205_C	B-6	472.661	1.39535	0.00922613	-0.000411276	144	3.59158	0.09982	11.8742
206_C	B-6	504.175	2.60556	0.0162274	-0.000169344	147.5	2.80274	0.06129	4.44678
233_C	B-6	402.735	1.02741	0.00707365	0.000470269	140.4	3.35447	0.1162	5.96625
234_C	B-6	858.033	4.05877	0.0254119	-0.000141465	147.5	2.80721	0.06685	5.85074
RM3
007_D	CalBraun	11854.1	0.495541	0.0488639	0.00135861	15.31	2.67726	0.7406	1.17982
008_D	CalBraun	3300.43	0.72223	0.0162712	<0.001	59.62	4.51981	0.549	2.08406
057_D	CalBraun	14117.2	0.507222	0.058772	<0.001	13.13	2.66437	0.7531	1.03207
058_D	CalBraun	2823.68	0.629742	0.013998	<0.001	60.32	3.9948	0.5462	2.30697
107_D	CalBraun	11493.5	0.501823	0.0472371	<0.001	16.05	3.48448	0.742	1.09957
108_D	CalBraun	3448.26	0.617719	0.0165904	0.000912475	51.11	3.18874	0.583	2.01427
157_D	CalBraun	19546.3	0.710026	0.0818822	<0.001	13.19	2.74221	0.7531	0.92749
158_D	CalBraun	3818.71	0.747913	0.0188555	<0.001	54.15	3.2576	0.5741	1.93091
207_D	CalBraun	3565.99	0.525945	0.0156976	<0.001	47.03	3.69632	0.6186	2.57348
208_D	CalBraun	5335.01	0.0141908	0.0244284	0.0536507	0.9181	8.78207	0.8216	1.80118
235_D	CalBraun	22457.9	0.501332	0.0965663	<0.001	7.993	2.62595	0.7746	0.897471
236_D	CalBraun	3383.87	0.703803	0.0155221	0.000981076	61.25	5.53021	0.5579	3.54432
Session 2
RM0
001_A	NIST	188291	0.806268	1.06369	0.913536	1.232	0.306212	0.8729	0.164212
002_A	NIST	190248	0.819042	1.07203	0.909511	1.242	0.214781	0.8733	0.14026
051_A	NIST	186094	0.838481	1.10355	0.90968	1.231	0.197338	0.8672	0.145206
052_A	NIST	182556	0.82709	1.08009	0.912116	1.242	0.226075	0.8693	0.174763
101_A	NIST	176174	0.825729	1.06419	0.913084	1.258	0.271112	0.8692	0.156617
102_A	NIST	175879	0.836198	1.09356	0.881019	1.24	0.272076	0.8693	0.144093
151_A	NIST	183835	0.843769	1.11483	0.908259	1.229	0.27474	0.872	0.163769
152_A	NIST	178760	0.821721	1.08801	0.912296	1.227	0.291424	0.872	0.125708
201_A	NIST	177042	0.816701	1.07481	0.914085	1.235	0.255544	0.8724	0.169745
202_A	NIST	177329	0.816883	1.07419	0.912187	1.236	0.288316	0.8726	0.140399
251_A	NIST	174673	0.812162	1.06195	0.91121	1.242	0.287489	0.8716	0.136017
252_A	NIST	174032	0.807322	1.06202	0.913208	1.235	0.221638	0.8725	0.144843
301_A	NIST	170152	0.800205	1.05629	0.913868	1.23	0.248864	0.8714	0.159108
302_A	NIST	172081	0.821988	1.06757	0.907318	1.25	0.297022	0.8708	0.166591
351_A	NIST	164062	0.804914	1.04983	0.912489	1.246	0.25269	0.8733	0.153373
352_A	NIST	167843	0.821257	1.07574	0.910673	1.238	0.254496	0.8693	0.152948
401_A	NIST	165260	0.859511	1.12387	0.906138	1.24	0.228384	0.8686	0.154192
402_A	NIST	161693	0.840564	1.09992	0.905722	1.239	0.248966	0.869	0.16784
451_A	NIST	136260	0.760104	1.01356	0.897205	1.217	0.761611	0.8696	0.157174
452_A	NIST	165762	0.938677	1.22725	0.898091	1.242	0.284175	0.8709	0.153345
493_A	NIST	96506.4	0.590583	0.79343	0.922412	1.209	0.819778	0.872	0.180461
		169740	0.814722	1.06954	0.908767	1.23619	1.72258	0.870914	0.40578
RM1
003_B	WC	10240.5	2.55321	0.101266	0.00151676	23.62	3.60155	0.08205	1.41461
004_B	WC	23713.5	4.59554	0.188685	0.00135763	23.26	3.62573	0.1032	2.72252
053_B	WC	11659.6	2.65778	0.108719	0.000713355	23.12	3.59974	0.09248	1.20512
054_B	WC	19730.3	3.75403	0.157231	0.00186112	22.94	3.61148	0.1099	1.83804
103_B	WC	20407.4	3.49744	0.153251	0.0019901	22.11	3.6055	0.1189	1.34847
104_B	WC	17205	3.0869	0.134391	0.00254447	22.15	3.63419	0.1137	2.24655
153_B	WC	17804.6	3.63589	0.150592	0.00210935	23.12	3.60647	0.1063	0.976515
203_B	WC	14302.2	3.53516	0.140991	0.00160076	23.65	3.605	0.08972	1.75049
253_B	WC	14623.1	2.87392	0.119871	0.000750049	23.06	3.60701	0.111	1.4175
254_B	WC	17823.2	3.4889	0.141686	0.00176611	23.75	3.6724	0.1141	1.51542
303_B	WC	17823.2	3.4889	0.141686	0.00176611	23.75	3.6724	0.1141	1.51542
304_B	WC	9951.01	2.66573	0.10613	0.00106228	23.56	3.59851	0.08352	1.66078
353_B	WC	11745.5	2.68989	0.106648	0.000755112	24	3.62238	0.09916	1.53941
354_B	WC	16739.5	2.65884	0.118665	0.000160964	22.06	3.60821	0.1372	1.24089
403_B	WC	9936.96	3.06327	0.11774	0.000731979	24.26	3.6022	0.07729	0.986976
404_B	WC	9140.2	3.08102	0.119821	0.000266209	23.91	3.59785	0.07447	1.30502
453_B	WC	18205.5	4.7609	0.189467	0.0013998	23.83	3.59859	0.09571	0.893186
454_B	WC	15686.5	3.44431	0.144793	0.000332291	23.06	3.64612	0.1197	1.53753
495_B	WC	13217.8	3.70535	0.14804	0.000617245	23.77	3.61078	0.09718	1.00988
496_B	WC	9650.05	3.61011	0.138065	0.000756649	24.51	3.59653	0.08278	1.15865
RM2
005_C	B-6	1328.16	1.76505	0.0117139	<0.001	142.4	3.70813	0.09184	5.49553
006_C	B-6	2286.05	0.153934	0.00403211	0.0196401	52.35	9.42058	0.5808	4.40803
055_C	B-6	3389.23	5.22071	0.0348604	0.000433282	140.5	3.772	0.08402	5.02045
056_C	B-6	4227	0.451004	0.00910895	0.000754969	65.03	7.16419	0.5145	3.86156
105_C	B-6	4653.01	4.07774	0.0294483	0.000962265	135.8	4.08182	0.133	7.79925
106_C	B-6	801.651	0.0291081	0.00129793	0.00207568	33.02	11.6147	0.6967	4.7496
155_C	B-6	1615.8	2.39759	0.0158988	<0.001	142.2	3.95063	0.089	4.45439
156_C	B-6	5973.85	1.0281	0.0136387	0.00545583	90.56	6.96446	0.386	8.38541
205_C	B-6	863.241	0.856372	0.00629729	<0.001	132.2	3.77879	0.1228	4.55041
206_C	B-6	2069.52	2.67884	0.0181838	<0.001	140.2	3.72356	0.09944	4.41938
255_C	B-6	1294.83	0.0177105	0.00200265	0.00640734	13.67	10.6534	0.7812	3.60433
256_C	B-6	1558.01	2.88872	0.0181137	<0.001	148.3	3.70113	0.07408	4.68493
305_C	B-6	4252.68	1.20886	0.0135307	<0.001	102.2	4.84681	0.3202	4.69562
306_C	B-6	806.615	1.07825	0.00724383	<0.001	141.7	3.93595	0.0994	5.49837
355_C	B-6	1287.07	0.208789	0.00325984	0.00109457	79.76	5.43669	0.4362	4.81235
356_C	B-6	5014.94	0.88507	0.0138437	<0.001	79.38	4.64989	0.4322	3.08344
405_C	B-6	2717.26	2.63468	0.0197033	0.00115574	132	3.84688	0.1398	5.84425
406_C	B-6	2982.83	0.252258	0.00669503	0.00191714	52.09	6.39404	0.594	2.95987
455_C	B-6	890.724	0.36766	0.00364752	<0.001	111.4	5.54502	0.2755	9.46365
456_C	B-6	1554.28	4.55197	0.0278038	<0.001	150	3.63553	0.05873	2.72638
497_C	B-6	550.732	1.23179	0.00790052	<0.001	146.2	3.79247	0.0832	4.96577
498_C	B-6	592.5	1.01625	0.00688599	<0.001	141.1	4.12169	0.104	8.5263
RM3
007_D	CalBraun	3452.81	1.06071	0.0107746	<0.001	112.5	3.90387	0.3188	2.08909
008_D	CalBraun	4129.46	0.348462	0.00842403	<0.001	56.22	9.38159	0.5672	3.56562
057_D	CalBraun	6417.02	0.781237	0.0145352	<0.001	70.12	4.45551	0.5047	2.22333
058_D	CalBraun	6956.86	1.14547	0.0174568	<0.001	82.93	4.45018	0.4578	2.00753
107_D	CalBraun	3506.45	0.538461	0.00815716	<0.001	83.42	6.45733	0.4574	5.1805
108_D	CalBraun	18778.3	0.656399	0.0357726	<0.001	27.06	3.69909	0.7001	1.02929
157_D	CalBraun	18579.3	0.506213	0.0349088	<0.001	21.6	3.88683	0.7174	0.967941
158_D	CalBraun	18752.1	0.601296	0.0365205	<0.001	24.33	3.64328	0.7037	0.940185
207_D	CalBraun	5325.52	0.652605	0.0124098	<0.001	69.19	3.91447	0.5176	1.72736
208_D	CalBraun	7592.74	0.615374	0.0162844	<0.001	52.3	3.93524	0.5959	1.43882
257_D	CalBraun	7515.74	0.717139	0.0159678	<0.001	60.68	4.91918	0.558	2.28854
258_D	CalBraun	9725.93	0.694367	0.020426	<0.001	47.58	3.72044	0.6139	1.27763
307_D	CalBraun	1179.46	0.286888	0.00337257	<0.001	101.7	6.61575	0.3787	5.8811
308_D	CalBraun	11041.8	0.531752	0.0222542	<0.001	34.59	3.86562	0.6686	1.21036
357_D	CalBraun	7182.29	0.659918	0.0164897	<0.001	54.98	4.191	0.584	1.55054
358_D	CalBraun	31078.2	0.589731	0.0622848	<0.001	14.38	3.61986	0.7511	0.745537
407_D	CalBraun	2790.39	0.658478	0.00843898	<0.001	95.31	4.49367	0.4093	2.52872
408_D	CalBraun	4724.3	0.700016	0.0124438	<0.001	73.23	5.21531	0.5014	2.60181
457_D	CalBraun	3222	0.636313	0.00987975	<0.001	82.17	3.9235	0.4716	2.19532
458_D	CalBraun	18150.8	0.77755	0.0431902	<0.001	26.59	3.86516	0.7025	1.02753
499_D	CalBraun	1442.38	0.43017	0.0055579	<0.001	93.93	4.89719	0.4	3.62154
500_D	CalBraun	45902.2	0.720949	0.117495	<0.001	9.447	3.62021	0.7744	0.660095
Session 3
RM0
001_A	NIST	154417	0.820213	2.21544	0.909001	1.239	0.254148	0.8722	0.180196
002_A	NIST	153990	0.821068	2.21862	0.909439	1.237	0.341141	0.8693	0.161178
051_A	NIST	152502	0.836268	2.24909	0.909096	1.231	0.290824	0.8708	0.196699
052_A	NIST	150054	0.829231	2.21234	0.906096	1.245	0.319701	0.8731	0.157966
101_A	NIST	139728	0.791826	2.12489	0.913898	1.238	0.232781	0.8696	0.141128
102_A	NIST	145572	0.82451	2.20868	0.907762	1.238	0.302929	0.8696	0.168735
151_A	NIST	143684	0.832706	2.22158	0.906614	1.242	0.228214	0.8724	0.130604
152_A	NIST	144524	0.833145	2.23632	0.908677	1.235	0.352366	0.8715	0.158878
201_A	NIST	143199	0.820283	2.19751	0.90906	1.235	0.351778	0.8713	0.173087
202_A	NIST	143032	0.820747	2.19626	0.909358	1.241	0.317121	0.8703	0.127103
		147070	0.823	2.20807	0.9089	1.2381	0.643679	0.87101	0.301229
RM1
003_B	WC	14138.7	2.48135	0.115446	<0.001	22.81	4.14424	0.1013	1.83784
004_B	WC	13858.1	2.69303	0.118138	<0.001	23.74	4.13964	0.09469	1.23075
053_B	WC	9982.5	1.50912	0.0749547	<0.001	22.33	4.14026	0.1193	2.06672
054_B	WC	15290.4	3.06832	0.134185	<0.001	23.74	4.13564	0.09502	1.50207
103_B	WC	17003.5	3.36846	0.151318	<0.001	23.34	4.13775	0.09726	1.31157
104_B	WC	15917.5	3.28273	0.1432	<0.001	23.93	4.13819	0.09588	2.4933
153_B	WC	20140.7	3.67177	0.173922	<0.001	22.6	4.13731	0.1049	1.83392
154_B	WC	18160.9	3.17049	0.149103	<0.001	23.14	4.13897	0.1105	0.900072
203_B	WC	18522.3	3.09392	0.149752	<0.001	22.62	4.1884	0.1134	1.67882
204_B	WC	7499.02	1.6832	0.0687995	<0.001	24.78	4.18139	0.08552	1.29387
RM2
005_C	ASH	2388.46	1.95154	0.00797495	<0.001	634.4	5.38172	0.6054	3.51474
006_C	ASH	1801.65	1.02144	0.00557454	<0.001	533.8	6.42513	0.6608	4.06926
055_C	ASH	7547.49	1.72676	0.0232476	<0.001	234	10.5314	0.7836	1.56218
056_C	ASH	1393.8	1.6709	0.00487622	<0.001	805.9	6.05017	0.5677	3.82455
105_C	ASH	1800.67	0.546274	0.00585404	<0.001	287.7	5.25731	0.729	3.68195
106_C	ASH	1915.83	0.788529	0.00633493	<0.001	363.1	5.59407	0.7256	3.60729
155_C	ASH	2728.76	1.11875	0.0089593	<0.001	372.4	8.69068	0.7269	2.64227
156_C	ASH	1089.03	1.82954	0.00417187	<0.001	979.9	5.79368	0.4864	4.56446
205_C	ASH	4241.72	0.934327	0.0140084	<0.001	206.2	5.16247	0.7804	2.03335
206_C	ASH	1500.3	1.51939	0.00539207	<0.001	702.8	5.58624	0.5837	3.77399
RM3
007_D	B-6	2211.93	0.181338	0.00748364	0.00567344	58.61	6.65677	0.5312	3.95499
008_D	B-6	353.406	0.0259389	0.00120367	<0.001	53.49	19.6087	0.5237	14.4978
057_D	B-6	1591.87	0.0333586	0.00479524	0.025523	21.86	12.767	0.7765	3.43046
058_D	B-6	751.106	0.119067	0.0026897	0.0076884	88.48	5.61955	0.4225	6.31712
107_D	B-6	990.405	0.925254	0.00781034	<0.001	133.3	4.42717	0.1185	9.67178
108_D	B-6	3863.38	5.79344	0.0409031	<0.001	141.7	4.16519	0.07813	3.29154
157_D	B-6	887.792	0.912198	0.00739662	<0.001	135.6	4.36964	0.1108	6.9382
158_D	B-6	6919.88	2.0276	0.0319005	<0.001	105.2	4.41463	0.2924	3.75203
207_D	B-6	2850.82	6.38737	0.0404607	<0.001	146.7	4.16252	0.0544	2.82269
208_D	B-6	1542.83	3.02459	0.0196486	<0.001	146.3	4.18577	0.06184	2.91383
Session 4
RM0
001_A	NIST	147777	0.825087	2.19358	0.908376	1.237	0.351397	0.8698	0.143523
002_A	NIST	148633	0.827453	2.20667	0.908968	1.235	0.370596	0.8716	0.195834
051_A	NIST	144783	0.812927	2.15882	0.906666	1.24	0.390342	0.8706	0.174058
052_A	NIST	145659	0.817771	2.16889	0.909319	1.243	0.272153	0.8731	0.156678
101_A	NIST	145490	0.824874	2.19479	0.910612	1.24	0.264244	0.8722	0.166353
102_A	NIST	145808	0.829841	2.19876	0.911972	1.243	0.226239	0.8692	0.163528
151_A	NIST	143604	0.821925	2.18977	0.910126	1.233	0.288104	0.8697	0.171775
152_A	NIST	144160	0.823618	2.20328	0.909273	1.227	0.29499	0.8702	0.155134
201_A	NIST	142016	0.827928	2.20823	0.906562	1.238	0.351442	0.8705	0.140147
202_A	NIST	140563	0.8158	2.18464	0.906231	1.233	0.303934	0.8723	0.184978
251_A	NIST	139147	0.823598	2.19901	0.904589	1.237	0.283427	0.8723	0.150124
252_A	NIST	139169	0.833173	2.19845	0.910439	1.251	0.251641	0.8714	0.237068
301_A	NIST	136629	0.822145	2.192	0.907407	1.235	0.224225	0.8703	0.147157
302_A	NIST	135095	0.816807	2.16737	0.913237	1.242	0.246555	0.8708	0.137438
351_A	NIST	134920	0.822625	2.19137	0.908036	1.237	0.305003	0.8713	0.126547
352_A	NIST	134378	0.820847	2.18102	0.911352	1.241	0.367211	0.8708	0.148523
401_A	NIST	134878	0.822189	2.20303	0.907569	1.226	0.265437	0.8697	0.15635
402_A	NIST	134079	0.823718	2.18537	0.910398	1.24	0.318078	0.8717	0.162615
451_A	NIST	134783	0.828119	2.20296	0.907869	1.237	0.307558	0.8712	0.173018
452_A	NIST	132580	0.819551	2.16865	0.908999	1.243	0.206404	0.8712	0.15782
		140208	0.823	2.18983	0.9089	1.2379	0.92128	0.87094	0.236114
RM1
003_B	WC	18586.3	3.34892	0.154108	<0.001	23.2	2.84878	0.1045	0.801148
004_B	WC	12354.4	2.87492	0.122076	<0.001	23.55	2.84892	0.0823	1.13069
053_B	WC	18440.8	3.47643	0.155777	<0.001	23.62	2.84347	0.1019	0.818015
054_B	WC	20342.6	3.47965	0.163283	<0.001	23.06	2.85241	0.1101	1.21725
103_B	WC	18179.7	3.51333	0.156684	<0.001	23.71	2.86238	0.1015	1.25498
104_B	WC	15756.2	3.21377	0.141664	<0.001	23.62	2.84783	0.096	0.867896
153_B	WC	16992.7	4.65573	0.186517	<0.001	24.38	2.85084	0.07417	0.97609
154_B	WC	10331.4	2.64939	0.110281	<0.001	23.7	2.8534	0.07743	1.28687
203_B	WC	16186.7	3.02612	0.139628	<0.001	23.15	2.8541	0.1053	0.842368
204_B	WC	14117.2	3.09902	0.135149	<0.001	23.56	2.85383	0.09137	1.12603
253_B	WC	13155.7	3.62276	0.147475	<0.001	24.11	2.84881	0.07573	1.04375
254_B	WC	24881.2	8.22005	0.317836	<0.001	24.49	2.83328	0.06395	0.768997
303_B	WC	21062.3	3.24834	0.167038	<0.001	21.87	2.84784	0.1243	0.855191
304_B	WC	12457.1	3.29323	0.135385	<0.001	24.19	2.84586	0.08017	0.981805
354_B	WC	13033	3.31336	0.141373	<0.001	23.43	2.86875	0.08192	1.19784
403_B	WC	14097.6	4.34744	0.173541	<0.001	24.17	2.84286	0.0698	1.12698
404_B	WC	19050.9	3.60508	0.170903	<0.001	22.67	2.86865	0.1076	1.10099
453_B	WC	19280.8	3.62624	0.169515	<0.001	23.18	2.85242	0.1104	0.831379
454_B	WC	18179	3.92881	0.172525	<0.001	23.95	2.84151	0.09937	0.893632
RM2
005_C	ASH	1895.72	1.28489	0.00590823	<0.001	613.1	5.8493	0.6373	4.01961
006_C	ASH	45194	0.469645	0.139778	<0.001	10.92	3.09203	0.8671	0.622483
055_C	ASH	2343.84	1.38144	0.00770744	<0.001	487.1	4.86324	0.671	3.20348
056_C	ASH	1363.87	2.80749	0.00505205	<0.001	1154	4.89931	0.4441	5.17918
105_C	ASH	1949.99	1.39315	0.00663284	<0.001	559.7	4.1101	0.6449	3.29464
106_C	ASH	1321.72	1.10998	0.00446163	<0.001	639.4	7.40402	0.6109	4.90019
155_C	ASH	3656.44	1.74383	0.0121632	<0.001	404.4	8.11974	0.7007	2.69862
156_C	ASH	1498.08	1.5378	0.00514213	<0.001	739.6	5.97471	0.5889	4.14279
205_C	ASH	4251.86	1.4781	0.0140422	<0.001	314.4	6.03685	0.7405	2.0116
206_C	ASH	1121.71	0.614099	0.00361039	<0.001	493.6	5.77527	0.6708	5.01836
255_C	ASH	257706	0.992756	0.83729	<0.001	3.837	9.9762	0.8703	0.382623
256_C	ASH	1176.87	0.159532	0.00394803	<0.001	125.1	6.46658	0.8074	4.68192
305_C	ASH	1439.79	0.569834	0.00476716	<0.001	359.5	5.13957	0.7348	4.34635
306_C	ASH	2225.44	0.737896	0.00747384	<0.001	299	5.75032	0.7257	3.16702
355_C	ASH	1368.42	0.763228	0.00465143	<0.001	484.8	5.39273	0.6744	4.79346
356_C	ASH	1756.67	0.999248	0.00614986	<0.001	458.5	8.10885	0.6741	4.31741
405_C	ASH	1814.68	0.445423	0.00595867	<0.001	244.5	9.99249	0.7808	4.3683
406_C	ASH	1223.84	1.38546	0.0042966	<0.001	843	7.85217	0.5649	5.43363
455_C	ASH	3793.98	1.6456	0.0131795	<0.001	370.6	5.90524	0.7191	2.38598
456_C	ASH	2755.01	1.16096	0.00859235	<0.001	442.4	7.07955	0.6914	4.02399
RM3
007_D	B-6	53846.1	5.70868	0.192073	0.00798945	66.39	4.42503	0.4853	2.52897
008_D	B-6	13668.8	1.29684	0.0449816	0.0082238	68.07	12.3656	0.468	11.5725
057_D	B-6	446.772	0.159845	0.00222208	<0.001	108.7	5.57074	0.2452	8.22676
058_D	B-6	11461.3	1.48444	0.0427813	<0.001	73.28	3.09552	0.4607	1.30818
107_D	B-6	459.84	0.850741	0.00564715	<0.001	143.7	3.14726	0.06429	7.47912
108_D	B-6	350.793	0.338619	0.00275361	<0.001	137.6	3.74516	0.118	11.1802
157_D	B-6	869.615	1.38105	0.0096057	<0.001	142.4	3.03796	0.07522	5.7794
158_D	B-6	1234.1	0.857717	0.00811723	0.00871507	127.5	3.41356	0.1424	9.67292
207_D	B-6	1243.34	2.54013	0.0165725	<0.001	145.3	2.90569	0.06037	3.69909
208_D	B-6	3483.8	2.84605	0.0252387	<0.001	131.2	2.94898	0.1365	2.73642
257_D	B-6	9048.18	5.33711	0.0565635	0.00220615	122.1	3.04224	0.1789	3.89865
258_D	B-6	7714.37	4.26462	0.0469677	0.000621339	118.6	4.35741	0.1821	13.5529
307_D	B-6	1432	1.86228	0.0141314	<0.001	137.8	2.96231	0.09251	3.78016
308_D	B-6	835.556	0.989133	0.00770595	<0.001	137.2	3.06962	0.1009	4.663
357_D	B-6	14026.7	5.16451	0.0710211	0.00291099	111.8	3.54128	0.2494	6.06055
358_D	B-6	1487.4	2.13128	0.0159089	<0.001	137	3.0441	0.08548	4.98925
407_D	B-6	1373.2	2.8436	0.01878	<0.001	144.3	2.9269	0.06209	3.81816
408_D	B-6	1050.69	0.0388857	0.00377589	<0.001	28.78	15.0767	0.6753	5.44251
457_D	B-6	2101.36	3.75493	0.0260559	<0.001	140.8	2.93222	0.0711	3.46705
458_D	B-6	716.588	1.44794	0.00963776	<0.001	143.7	3.00212	0.06382	5.23389
