# Supplementary material for: In situ LA-ICPMS U–Pb dating of sulfates: applicability of carbonate reference materials as matrix-matched standards
Source: Copernicus journal article supplement (doi:10.5194/gchron-4-601-2022), 2022-09-06
Supplement: Supplementary file [file gchron-4-601-2022-supplement-title-page.pdf › gchron-4-601-2022-supplement-title-page.pdf]

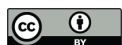

*Supplement of*

**In situ LA-ICPMS U–Pb dating of sulfates: applicability of carbonate reference materials as matrix-matched standards**

**Aratz Beranoaguirre et al.**

*Correspondence to:* Aratz Beranoaguirre (aratz.beranoaguirre@kit.edu)

- gchron-4-601-2022-supplement-title-page.pdf
- Supplementary Tables
  - Table S1. Element data.xlsx
  - Table S2. Neptune data.xlsx

The copyright of individual parts of the supplement might differ from the article licence.
